# Supplementary material for: Histone variant Htz1 promotes histone H3 acetylation to enhance nucleotide excision repair in Htz1 nucleosomes
Source: Nucleic Acids Res. 2013 Aug 7;41(19):9006–19. doi: 10.1093/nar/gkt688 (PMC3799447; doi:10.1093/nar/gkt688)
Supplement: Supplementary Data [file supp_gkt688_nar-01201-d-2013-File010.pdf]

## Supplementary Figure S1

**A.**

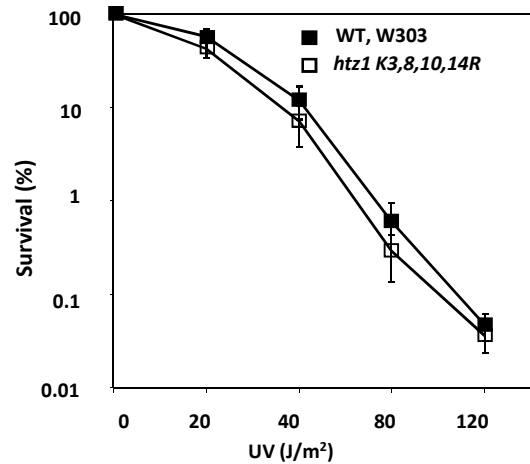

**B.**

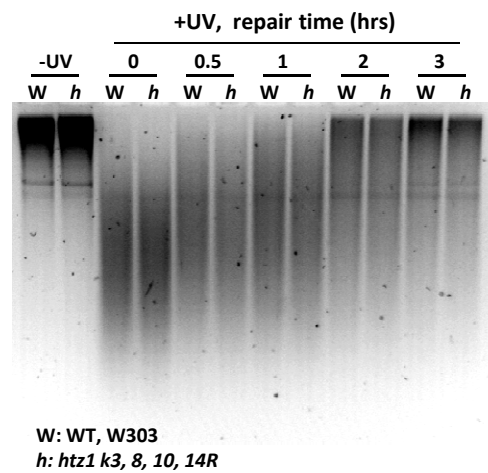

**Figure S1. Htz1 acetylation at K3, 8, 10, 14 does not contribute to CPD repair and cell survival following UV irradiation. A** The sensitivity to UV irradiation. In *htz1* K3,8,10,14R, the four lysines at K3, 8, 10, and 14 of endogenous Htz1 were mutated to arginines (R). Data are the average of at least three independent experiments  $\pm$  SD. **B** Repair of CPDs from the overall genome. DNA from samples taken before and after UV (100J/m<sup>2</sup>) was treated with a CPD specific endonuclease. The digestion products were then separated by gel electrophoresis under denaturing conditions. The gel was stained with EtBr.

## Supplementary Figure S2

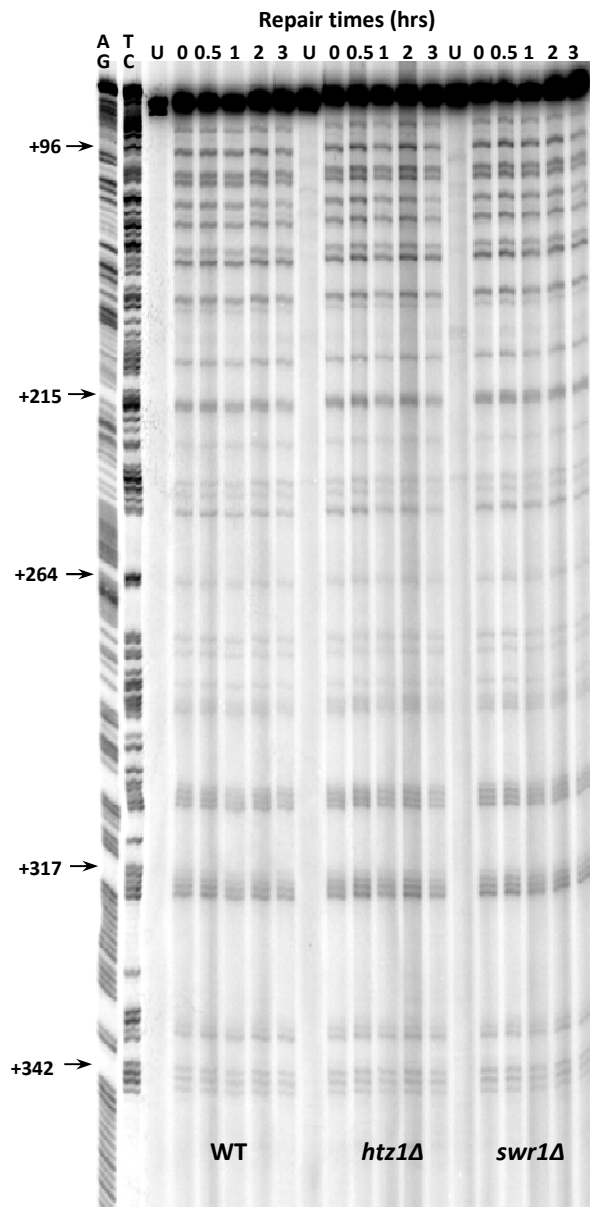

**Figure S2. Repair of CPDs in the top strand of *HMRA1* coding region.** Gel depicting CPDs in the top strand of the *RsaI*-*Bgl*III fragment (+61 to +476) in the *HMRA1* sequence following a UV dose of 100 J/m<sup>2</sup>. In the left of gel are the sequences of the strand of interest, shown in combinations of A, G and C, T, respectively. Lane U is DNA from mock irradiated cells while 0, 0.5, 1, 2 and 3 are DNA from irradiated cells following 0, 0.5, 1, 2 and 3 hour repair, respectively.

Supplementary Figure S3

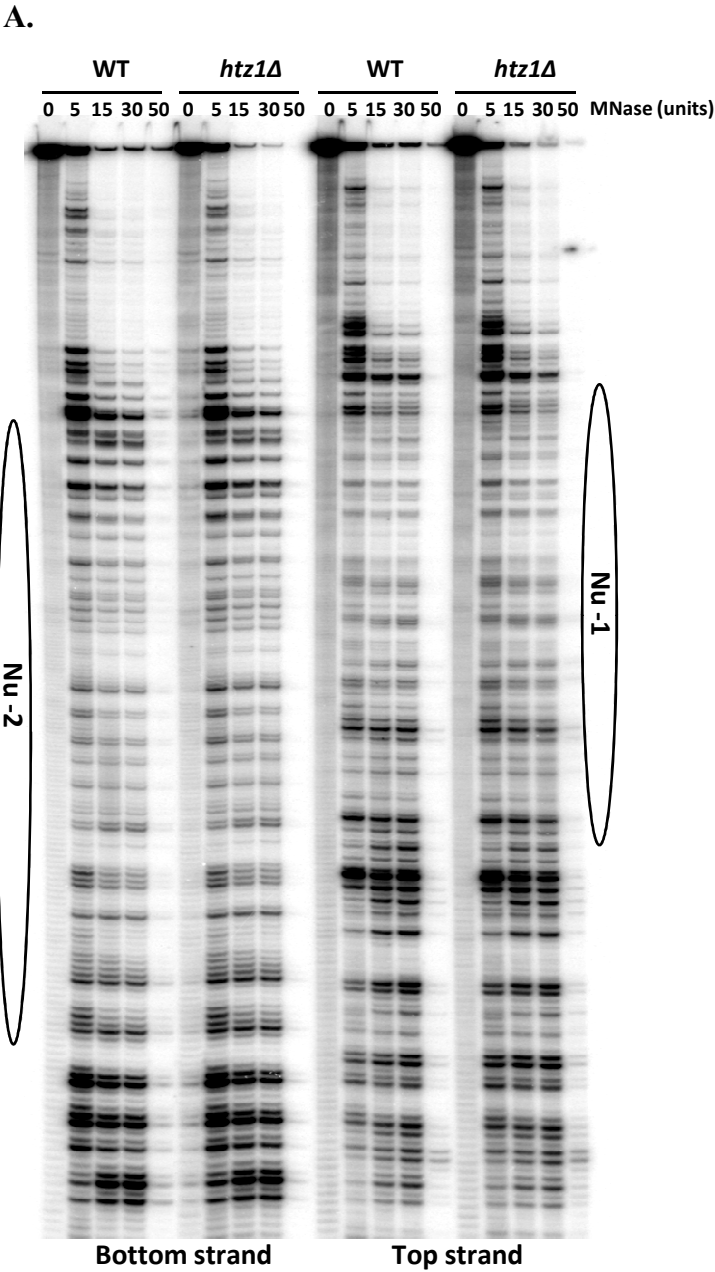

# Supplementary Figure S3

B.

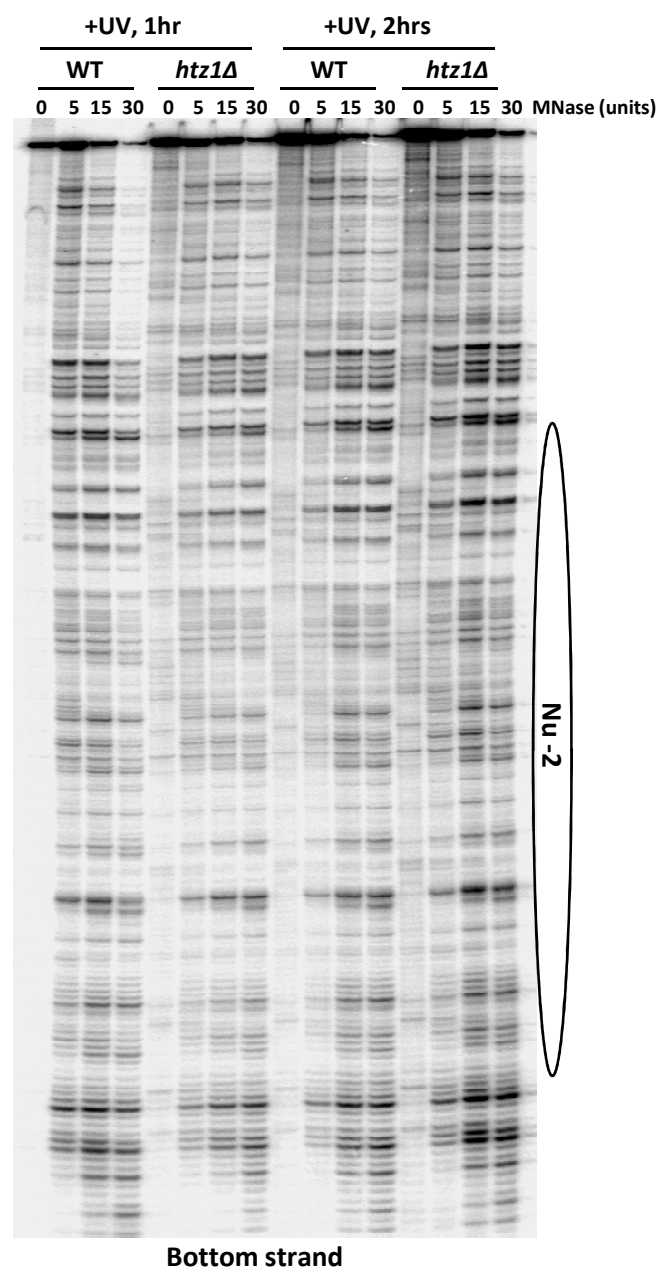

# Supplementary Figure S3

C.

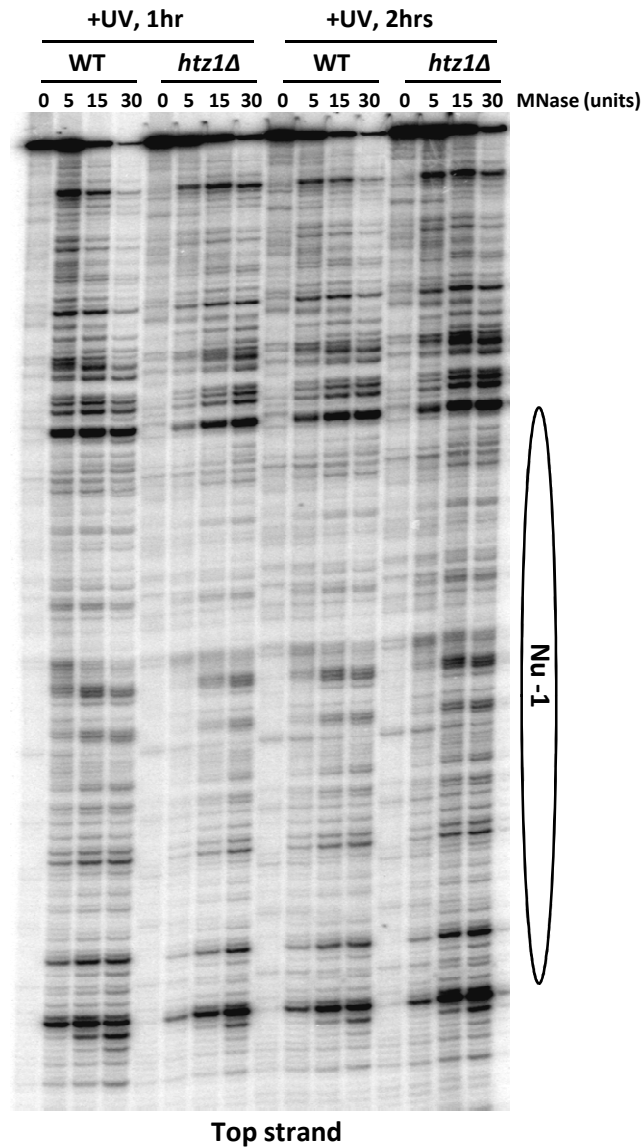

**Figure S3. MNase sensitivity of the nucleosomal DNA in Htz1 nucleosomes in the *MFA2* promoter.** Chromatin was extracted and treated with MNase as described in Materials and Methods. The region being analysed is the *HaeIII* fragment (-516 to +83) in the *MFA2* promoter. **A.** MNase sensitivity of the nucleosomal DNA in the *MFA2* promoter in wild type and the *htz1Δ* mutant without UV treatment. **B and C.** MNase sensitivity of the nucleosomal DNA in the *MFA2* promoter in wild type and the *htz1Δ* mutant after UV (100 J/m<sup>2</sup>) and allowed repair times as indicated. The amount of MNase applied is indicated in units at the top of the gels.
